# Supplementary material for: Understanding solid-state photoswitching in [Re(OMe2-bpy)(CO)3(η1-NO2)] crystals via in situ photocrystallography
Source: Royal Society of Chemistry journal article supplement (doi:10.1039/c8ce00774h), 2018-01-01
Supplement: c8ce00774h1.pdf [file c8ce00774h1.pdf]

# Understanding solid-state photoswitching in $[\text{Re}(\text{OMe}_2\text{-bpy})(\text{CO})_3(\eta^1\text{-NO}_2)]$ crystals *via in-situ* photocrystallography

L. E. Hatcher\*<sup>a</sup>

## Supplementary Information

### Contents

1. Supplementary GS structure information for 1 at 150 K
2. Diffuse reflectance spectroscopy
3. Supplementary MS structure information for 1 at 150 K
4. Reaction cavity analysis
5. Steady-state photocrystallographic data for 1 at 170 K
6. Supplementary structure data for pseudo-steady-state studies
7. References

## 1. Supplementary GS structure information for 1 at 150 K

Figure S1: Void space diagram for the GS X-ray structure of 1 at 150 K.

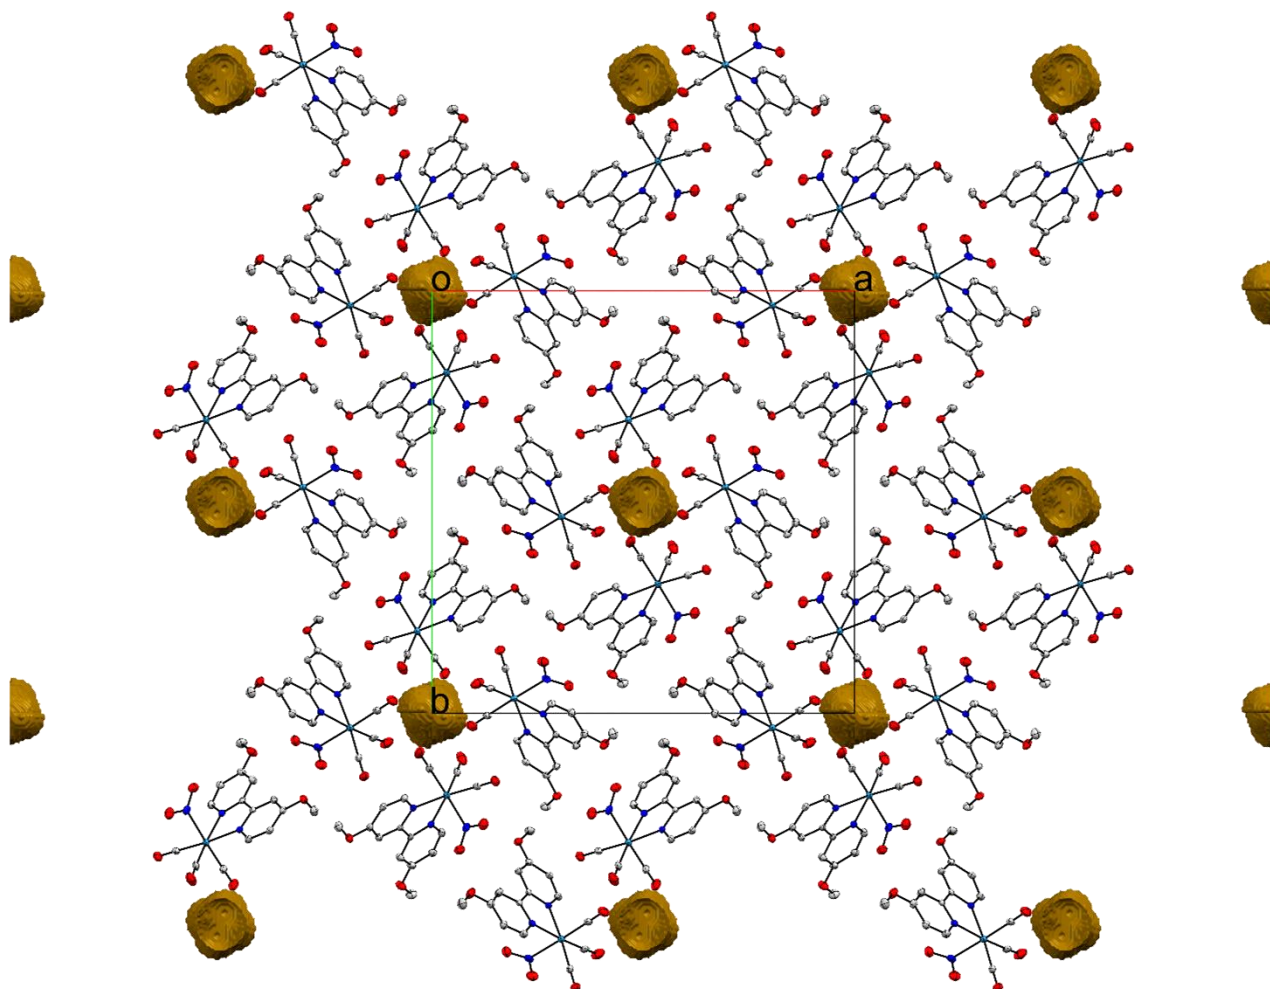

Table S1: Intermolecular C-H...O contacts to the nitro-( $\eta^1$ -NO<sub>2</sub>) isomer in the GS structure of 1 at 150 K.

| Identifier          | D...A Distance / Å | D...H distance <sup>†</sup> / Å | DHA angle <sup>†</sup> / ° |
|---------------------|--------------------|---------------------------------|----------------------------|
| C(15)-H(15B)...O(2) | 3.62(1)            | 2.65                            | 168.6                      |
| C(10)-H(10)...O(2)  | 3.51(1)            | 2.63                            | 155.1                      |
| C(10)-H(10)...O(1)  | 3.39(1)            | 2.51                            | 153.2                      |
| C(7)-H(7)...O(2)    | 3.81(1)            | 2.92                            | 155.7                      |
| C(7)-H(7)...O(1)    | 3.63(1)            | 2.73                            | 159.2                      |
| C(5)-H(5)...(O1)    | 3.15(1)            | 2.28                            | 153.2                      |
| Average value       | 3.52(2)            | 2.62                            | 157.5                      |

<sup>†</sup>D...H distances and DHA angles have no esd as all hydrogens were refined to fixed distances using a riding model (AFIX instruction)

## 2. Diffuse reflectance spectroscopy

Solid state diffuse reflectance spectra were collected using an Ocean Optics Maya 200 PRO High Sensitivity Spectrometer equipped with an Ocean Optics DH-2000-BCA UV-Vis-NIR light source.

Spectra were collected on evenly-ground powder samples, prepared from pure single-crystals. Figure S2 shows the experimental diffuse reflectance spectra of **1**. Figure S3 shows the normalised absorption profiles for **1**, converted from the diffuse reflectance data using the Kubelka Munk function:

$$A = \frac{(1 - R_{\infty})}{2R_{\infty}}$$

where  $A$  = calculated absorbance and  $R$  = diffuse reflectance.<sup>1</sup>

Figure S2: Solid state diffuse reflectance spectrum for **1** at room temperature.

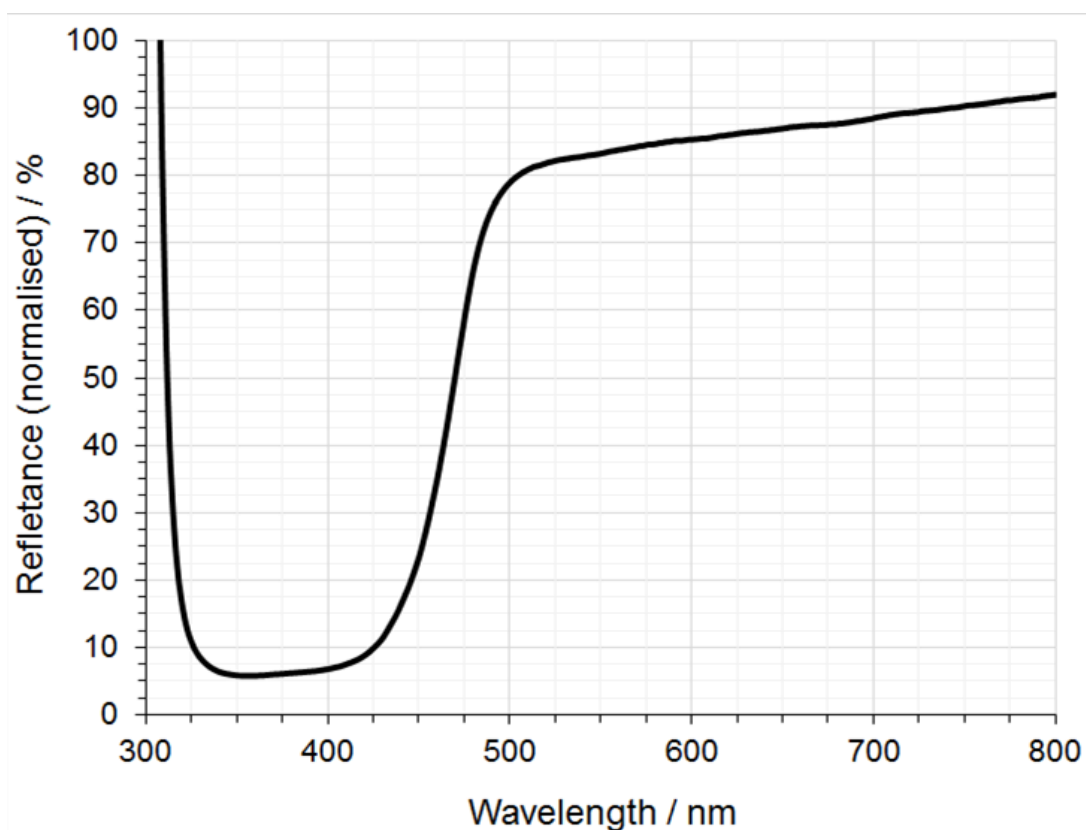

Figure S3: Solid state Kubelka Munk absorption spectrum for 1 at room temperature.

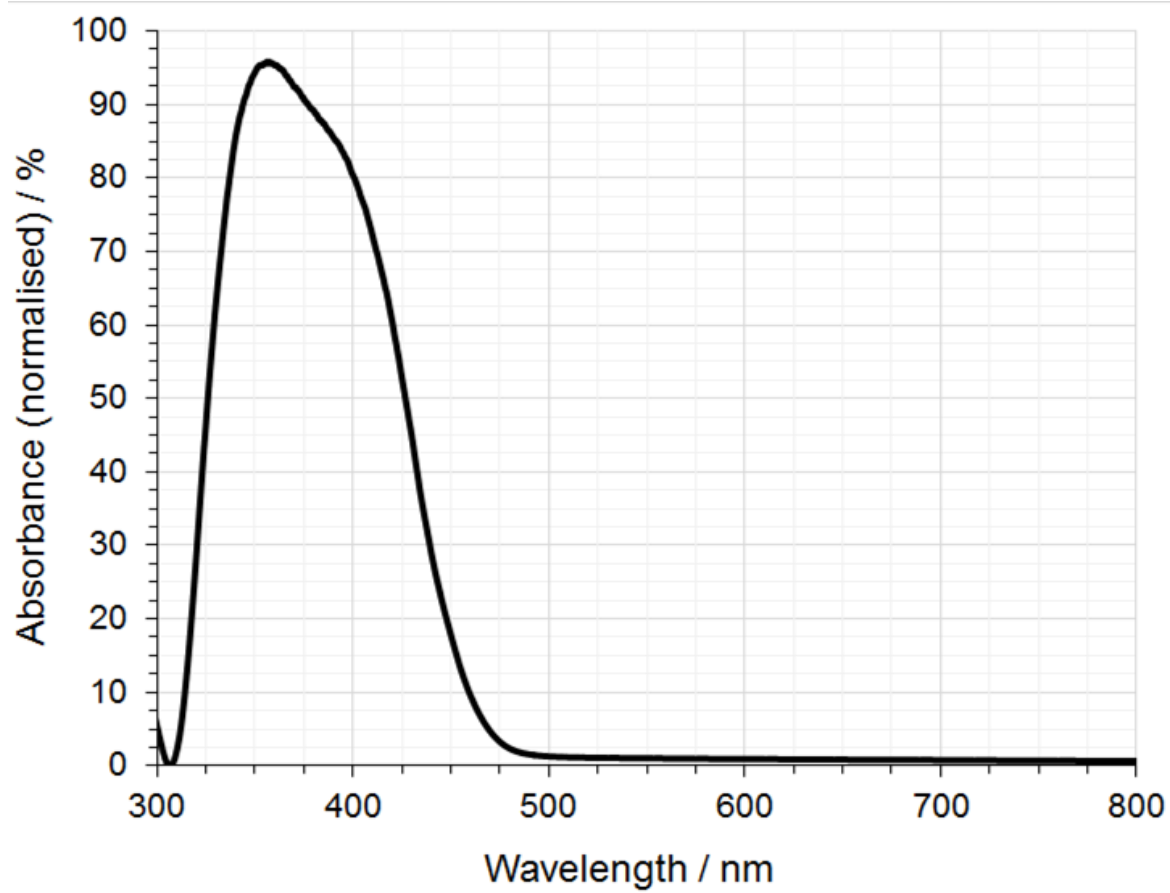

### 3. Supplementary MS structure information for 1 at 150 K

**Table S2:** Nitro:nitrito isomer occupancy ratios refined from single-crystal X-ray data during all steady-state photocrystallographic studies with **1** at 150 K, as a function of temperature and irradiation time

| Temp / K | Irradiation time / min | Nitrite occupancy level |             |
|----------|------------------------|-------------------------|-------------|
|          |                        | Nitro-NO <sub>2</sub>   | Nitrito-ONO |
| 150      | 0                      | 1.00                    | 0.00        |
| 150      | 1                      | 0.71                    | 0.29        |
| 150      | 5                      | 0.58                    | 0.42        |
| 150      | 15                     | 0.52                    | 0.48        |
| 150      | 60                     | 0.46                    | 0.54        |
| 150      | 180                    | 0.42                    | 0.58        |
| 175      | 180                    | 0.42                    | 0.58        |
| 200      | 180                    | 0.49                    | 0.51        |
| 210      | 180                    | 0.69                    | 0.31        |
| 220      | 180                    | 1.00                    | 0.00        |
| 230      | 180                    | 1.00                    | 0.00        |
| 250      | 180                    | 1.00                    | 0.00        |

**Figure S4:** Crystal packing diagram for the MS structure of **1** at 150 K.

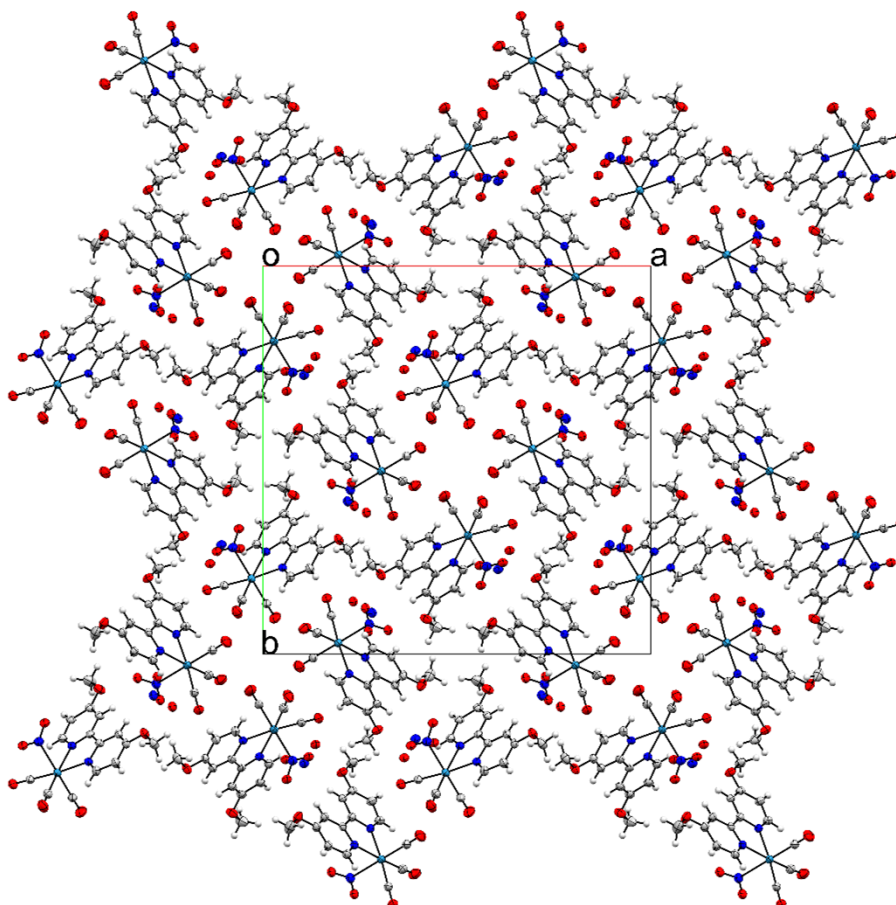

**Table S3: Single crystal X-ray data for steady state photocrystallographic studies with 1 at 150 K.** Selected crystal data for 1 under illumination with 405nm, collected under steady state photocrystallographic conditions between 1 and 60 min total irradiation time

|                                              | 1 min 405 nm                            | 5 min 405 nm                            |
|----------------------------------------------|-----------------------------------------|-----------------------------------------|
| Photoconversion                              | 29 %                                    | 42 %                                    |
| Temperature                                  | 150(2) K                                | 150(2) K                                |
| Wavelength                                   | 0.71073 Å                               | 0.71073 Å                               |
| Empirical formula                            | C15 H12 N3 O7 Re1                       | C15 H12 N3 O7 Re1                       |
| Formula Weight                               | 532.48 g mol <sup>-1</sup>              | 532.48 g mol <sup>-1</sup>              |
| Crystal system                               | Tetragonal                              | Tetragonal                              |
| Space group                                  | I-4                                     | I-4                                     |
| Unit cell parameters (constrained)           | $a = 22.4161(5)$ Å<br>$c = 6.6101(3)$ Å | $a = 22.5083(8)$ Å<br>$c = 6.5855(4)$ Å |
| Volume                                       | 3321.4(2) Å <sup>3</sup>                | 3336.4(3) Å <sup>3</sup>                |
| Z                                            | 8                                       | 8                                       |
| Density (calculated)                         | 2.130 g cm <sup>-1</sup>                | 2.120 g cm <sup>-1</sup>                |
| Absorption coefficient $\mu$                 | 7.362 mm <sup>-1</sup>                  | 7.329 mm <sup>-1</sup>                  |
| $F(000)$                                     | 2032                                    | 2032                                    |
| $R(\text{int})$                              | 0.0567                                  | 0.0760                                  |
| Completeness (to $\vartheta = 25.00^\circ$ ) | 0.998                                   | 0.998                                   |
| $R1$ (observed data $I > 2\sigma(I)$ )       | 0.0456                                  | 0.0532                                  |
| $wR2$ (all data)                             | 0.0881                                  | 0.0982                                  |
| Reflections (independent)                    | 6060 (2918)                             | 6083 (2918)                             |
| Flack parameter                              | -0.027(17)                              | -0.03(2)                                |

  

|                                              | 15 min 405 nm                           | 60 min 405 nm                           |
|----------------------------------------------|-----------------------------------------|-----------------------------------------|
| Photoconversion                              | 48 %                                    | 54 %                                    |
| Temperature                                  | 150(2) K                                | 150(2) K                                |
| Wavelength                                   | 0.71073 Å                               | 0.71073 Å                               |
| Empirical formula                            | C15 H12 N3 O7 Re1                       | C15 H12 N3 O7 Re1                       |
| Formula Weight                               | 532.48 g mol <sup>-1</sup>              | 532.48 g mol <sup>-1</sup>              |
| Crystal system                               | Tetragonal                              | Tetragonal                              |
| Space group                                  | I-4                                     | I-4                                     |
| Unit cell parameters (constrained)           | $a = 22.5635(5)$ Å<br>$c = 6.5794(2)$ Å | $a = 22.6151(5)$ Å<br>$c = 6.5646(3)$ Å |
| Volume                                       | 3349.65(19) Å <sup>3</sup>              | 3357.4(2) Å <sup>3</sup>                |
| Z                                            | 8                                       | 8                                       |
| Density (calculated)                         | 2.112 g cm <sup>-1</sup>                | 2.107 g cm <sup>-1</sup>                |
| Absorption coefficient $\mu$                 | 7.300 mm <sup>-1</sup>                  | 7.283 mm <sup>-1</sup>                  |
| $F(000)$                                     | 2032                                    | 2032                                    |
| $R(\text{int})$                              | 0.0569                                  | 0.0625                                  |
| Completeness (to $\vartheta = 25.00^\circ$ ) | 0.998                                   | 0.9968                                  |
| $R1$ (observed data $I > 2\sigma(I)$ )       | 0.0428                                  | 0.0449                                  |
| $wR2$ (all data)                             | 0.0824                                  | 0.0858                                  |
| Reflections (independent)                    | 6080 (2928)                             | 6059 (2928)                             |
| Flack parameter                              | -0.038(16)                              | -0.04(2)                                |

Figure S5: Mercury<sup>2</sup> void space diagram for the MS structure of 1 at 150 K.

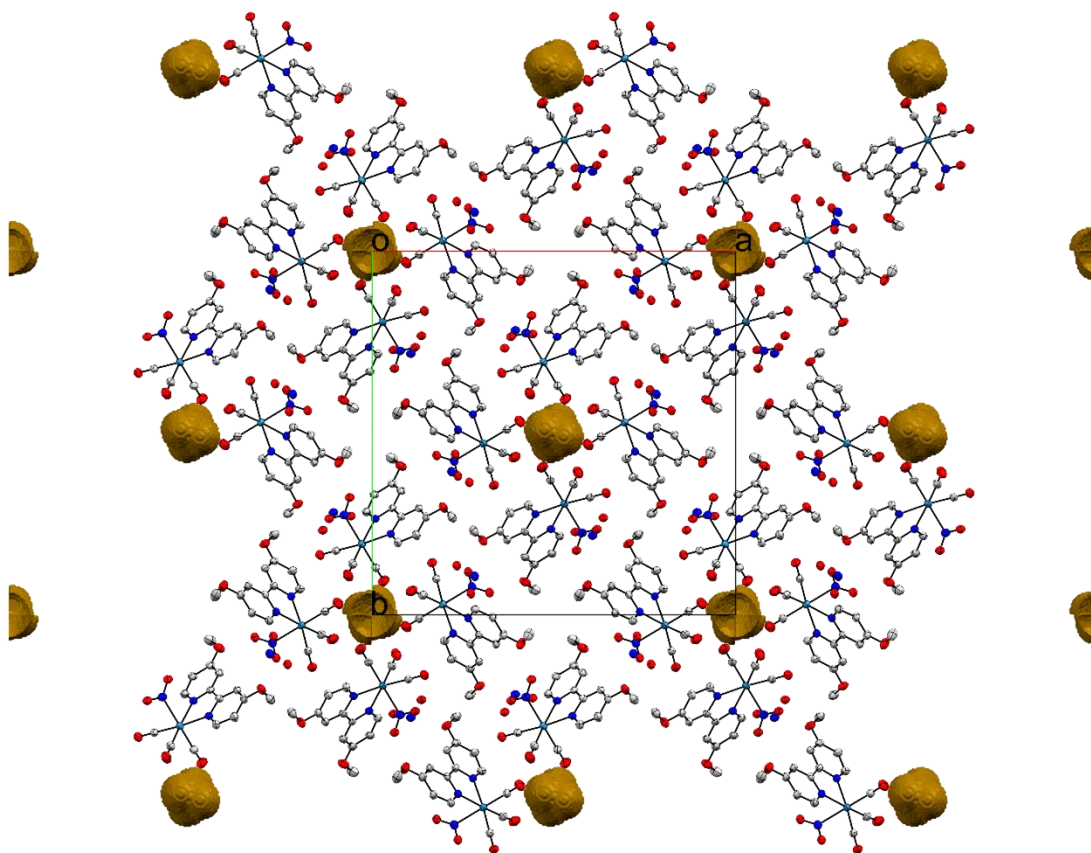

**Table S4: Single crystal X-ray data for variable temperature studies with 1 after irradiation.** Selected crystal data for 1 with increasing temperature, following irradiation for 180 min with 405 nm LED light

|                                              | VT 175 K                                 | VT 200 K                                |
|----------------------------------------------|------------------------------------------|-----------------------------------------|
| ONO conversion level                         | 58 %                                     | 51 %                                    |
| Temperature                                  | 175(2) K                                 | 200(2) K                                |
| Wavelength                                   | 0.71073 Å                                | 0.71073 Å                               |
| Empirical formula                            | C15 H12 N3 O7 Re1                        | C15 H12 N3 O7 Re1                       |
| Formula Weight                               | 532.48 g mol <sup>-1</sup>               | 532.48 g mol <sup>-1</sup>              |
| Crystal system                               | Tetragonal                               | Tetragonal                              |
| Space group                                  | I-4                                      | I-4                                     |
| Unit cell parameters (constrained)           | $a = 22.7219(11)$ Å<br>$c = 6.5890(6)$ Å | $a = 22.6358(9)$ Å<br>$c = 6.5964(4)$ Å |
| Volume                                       | 3401.8(5) Å <sup>3</sup>                 | 3379.9(3) Å <sup>3</sup>                |
| Z                                            | 8                                        | 8                                       |
| Density (calculated)                         | 2.079 g cm <sup>-3</sup>                 | 2.093 g cm <sup>-3</sup>                |
| Absorption coefficient $\mu$                 | 7.188 mm <sup>-1</sup>                   | 7.235 mm <sup>-1</sup>                  |
| $F(000)$                                     | 2032                                     | 2032                                    |
| $R(\text{int})$                              | 0.0761                                   | 0.0499                                  |
| Completeness (to $\vartheta = 25.00^\circ$ ) | 0.996                                    | 0.997                                   |
| $R1$ (observed data $I > 2\sigma(I)$ )       | 0.0635                                   | 0.0411                                  |
| $wR2$ (all data)                             | 0.1109                                   | 0.0608                                  |
| Reflections (independent)                    | 5838 (3036)                              | 6019 (3044)                             |
| Flack parameter                              | 0.01(2)                                  | -0.006(14)                              |

|                                              | VT 210 K                                | VT 220 K                                |
|----------------------------------------------|-----------------------------------------|-----------------------------------------|
| ONO conversion level                         | 31 %                                    | 0 %                                     |
| Temperature                                  | 210(2) K                                | 220(2) K                                |
| Wavelength                                   | 0.71073 Å                               | 0.71073 Å                               |
| Empirical formula                            | C15 H12 N3 O7 Re1                       | C15 H12 N3 O7 Re1                       |
| Formula Weight                               | 532.48 g mol <sup>-1</sup>              | 532.48 g mol <sup>-1</sup>              |
| Crystal system                               | Tetragonal                              | Tetragonal                              |
| Space group                                  | I-4                                     | I-4                                     |
| Unit cell parameters (constrained)           | $a = 22.5343(9)$ Å<br>$c = 6.6415(5)$ Å | $a = 22.4172(8)$ Å<br>$c = 6.6766(5)$ Å |
| Volume                                       | 3372.5(4) Å <sup>3</sup>                | 3355.2(3) Å <sup>3</sup>                |
| Z                                            | 8                                       | 8                                       |
| Density (calculated)                         | 2.097 g cm <sup>-3</sup>                | 2.108 g cm <sup>-3</sup>                |
| Absorption coefficient $\mu$                 | 7.251 mm <sup>-1</sup>                  | 7.288 mm <sup>-1</sup>                  |
| $F(000)$                                     | 2032                                    | 2032                                    |
| $R(\text{int})$                              | 0.0485                                  | 0.0473                                  |
| Completeness (to $\vartheta = 25.00^\circ$ ) | 0.998                                   | 0.998                                   |
| $R1$ (observed data $I > 2\sigma(I)$ )       | 0.0416                                  | 0.0394                                  |
| $wR2$ (all data)                             | 0.0643                                  | 0.0611                                  |
| Reflections (independent)                    | 6021 (3049)                             | 6018 (3044)                             |
| Flack parameter                              | -0.021(14)                              | -0.019(13)                              |



|                                           | VT 230 K                                | VT 250 K                                |
|-------------------------------------------|-----------------------------------------|-----------------------------------------|
| ONO conversion level                      | 0 %                                     | 0 %                                     |
| Temperature                               | 230(2) K                                | 250(2) K                                |
| Wavelength                                | 0.71073 Å                               | 0.71073 Å                               |
| Empirical formula                         | C15 H12 N3 O7 Re1                       | C15 H12 N3 O7 Re1                       |
| Formula Weight                            | 532.48 g mol <sup>-1</sup>              | 532.48 g mol <sup>-1</sup>              |
| Crystal system                            | Tetragonal                              | Tetragonal                              |
| Space group                               | I-4                                     | I-4                                     |
| Unit cell parameters (constrained)        | $a = 22.3673(5)$ Å<br>$c = 6.6855(2)$ Å | $a = 22.3700(6)$ Å<br>$c = 6.6942(3)$ Å |
| Volume                                    | 3344.73(18) Å <sup>3</sup>              | 3349.9(2) Å <sup>3</sup>                |
| Z                                         | 8                                       | 8                                       |
| Density (calculated)                      | 2.115 g cm <sup>-3</sup>                | 2.112 g cm <sup>-3</sup>                |
| Absorption coefficient $\mu$              | 7.311 mm <sup>-1</sup>                  | 7.300 mm <sup>-1</sup>                  |
| $F(000)$                                  | 2032                                    | 2032                                    |
| $R(\text{int})$                           | 0.0383                                  | 0.0388                                  |
| Completeness (to $\theta = 25.00^\circ$ ) | 0.994                                   | 0.994                                   |
| $R1$ (observed data $I > 2\sigma(I)$ )    | 0.0376                                  | 0.0388                                  |
| $wR2$ (all data)                          | 0.0808                                  | 0.0776                                  |
| Reflections (independent)                 | 6911 (2995)                             | 6895 (2998)                             |
| Flack parameter                           | -0.034(11)                              | -0.035(11)                              |

**Table S5: C-H...O distances for the MS structure of 1 at 150 K.**

| Identifier           | D...A Distance / Å | D...H distance <sup>†</sup> / Å | DHA angle <sup>†</sup> / ° |
|----------------------|--------------------|---------------------------------|----------------------------|
| C(4)-H(4)...O(2A)    | 3.87(2)            | 3.00                            | 158.0                      |
| C(15)-H(15C)...O(2A) | 3.26(3)            | 2.33                            | 153.0                      |
| Average value        | 3.57(4)            | 2.67                            | 155.5                      |

<sup>†</sup>D...H distances and DHA angles have no esd as all hydrogens were refined to fixed distances using a riding model (AFIX instruction)

## 4. Reaction cavity analysis

**Figure S6: Mercury<sup>2</sup> void space diagrams showing the shape of the reactions cavity for the GS and MS of 1 at 150 K.** (a) Initial void space diagram for the GS unit cell (no reaction cavity), (b) void space diagram including the reaction cavities around the photoactive nitrite ligand, (c) initial void space diagram for the MS unit cell (no reaction cavity), (d) void space diagram including the reaction cavities around the photoactive nitrite ligand.

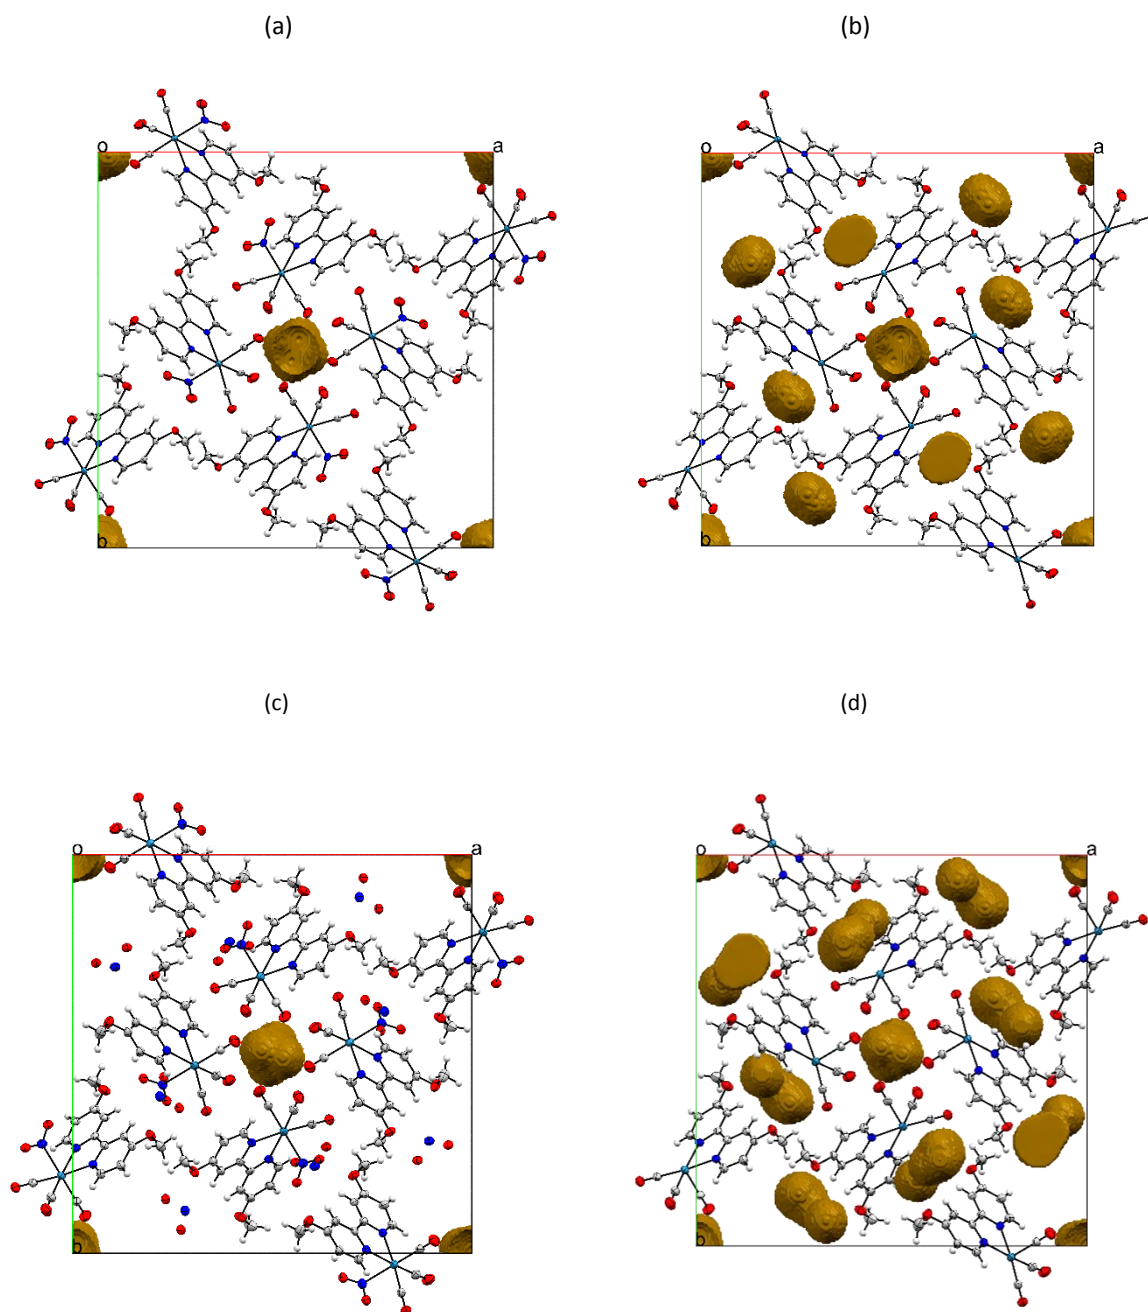

## 5. Steady-state photocrystallographic data for 1 at 170 K

**Table S6: Single crystal X-ray data for 1 at 170 K.** Selected crystal data for the ground state (GS) and the metastable state (MS) at 170 K

|                                           | Ground State (GS)                   | Metastable State (MS)               |
|-------------------------------------------|-------------------------------------|-------------------------------------|
| Photoconversion                           | 0 %                                 | 66 %                                |
| Irradiation time (total)                  | 0 min                               | 180 min                             |
| Temperature                               | 170(2) K                            | 170(2) K                            |
| Wavelength                                | 0.71073 Å                           | 0.71073 Å                           |
| Empirical formula                         | C15 H12 N3 O7 Re1                   | C15 H12 N3 O7 Re1                   |
| Formula Weight                            | 532.48 g mol <sup>-1</sup>          | 532.48 g mol <sup>-1</sup>          |
| Crystal system                            | Tetragonal                          | Tetragonal                          |
| Space group                               | I-4                                 | I-4                                 |
| Unit cell parameters (constrained)        | a = 22.3068(3) Å<br>c = 6.6532(2) Å | a = 22.6722(6) Å<br>c = 6.5648(3) Å |
| Volume                                    | 3310.6(2) Å <sup>3</sup>            | 3374.5(2) Å <sup>3</sup>            |
| Z                                         | 8                                   | 8                                   |
| Density (calculated)                      | 2.137 g cm <sup>-3</sup>            | 2.096 g cm <sup>-3</sup>            |
| Absorption coefficient $\mu$              | 7.386 mm <sup>-1</sup>              | 7.246 mm <sup>-1</sup>              |
| F(000)                                    | 2032                                | 2032                                |
| R(int)                                    | 0.0456                              | 0.0536                              |
| Completeness (to $\theta = 25.00^\circ$ ) | 0.998                               | 0.998                               |
| R1 (observed data $I > 2\sigma(I)$ )      | 0.0283                              | 0.0453                              |
| wR2 (all data)                            | 0.0448                              | 0.1121                              |
| Reflections (independent)                 | 10308 (3365)                        | 8014 (3440)                         |
| Flack parameter                           | -0.028(9)                           | -0.010(11)                          |

## 6. Supplementary structure data for pseudo-steady-state studies

**Table S7:** Nitro:nitrito isomer occupancy ratios refined from single-crystal X-ray data during all pseudo-steady-state photocrystallographic studies with **1** at 150 K, as a function of temperature

| Temp / K | Nitrite occupancy level |             |
|----------|-------------------------|-------------|
|          | Nitro-NO <sub>2</sub>   | Nitrito-ONO |
| 150      | 0.41                    | 0.59        |
| 175      | 0.34                    | 0.66        |
| 200      | 0.36                    | 0.64        |
| 210      | 0.40                    | 0.60        |
| 220      | 0.62                    | 0.38        |
| 230      | 0.74                    | 0.26        |
| 240      | 1.00                    | 0.00        |
| 250      | 1.00                    | 0.00        |

**Table S8: Reaction cavity ( $V_c$ ) analysis for the pseudo-steady-state structures of **1** at 150 and 175 K.**  $V_c$  determined by removing the nitrite group and performing a contact surface void space calculation in Mercury<sup>2</sup> (probe radius 1.2 Å, grid spacing 0.1 Å) and subtracting the initial void volume

|           | $V_c$ per unit cell / Å <sup>3</sup> | $V_c$ per molecule / Å <sup>3</sup> | $\Delta V_c$ (MS-GS) / Å <sup>3</sup> | $\Delta V_c$ (MS-GS) / % |
|-----------|--------------------------------------|-------------------------------------|---------------------------------------|--------------------------|
| PSS 150 K | 192.38                               | 24.05                               | -1.02                                 | -0.5                     |
| PSS 170 K | 191.36                               | 23.92                               |                                       |                          |

**Table S9: Single crystal X-ray data for pseudo-steady-state studies with 1 at 200 – 250 K**

|                                              | PSS 200 K                              | PSS 210K                                 |
|----------------------------------------------|----------------------------------------|------------------------------------------|
| Photoconversion                              | 64 %                                   | 60 %                                     |
| Temperature                                  | 200(2) K                               | 210(2) K                                 |
| Wavelength                                   | 0.71073 Å                              | 0.71073 Å                                |
| Empirical formula                            | C15 H12 N3 O7 Re1                      | C15 H12 N3 O7 Re1                        |
| Formula Weight                               | 532.48 g mol <sup>-1</sup>             | 532.48 g mol <sup>-1</sup>               |
| Crystal system                               | Tetragonal                             | Tetragonal                               |
| Space group                                  | I-4                                    | I-4                                      |
| Unit cell parameters (constrained)           | $a = 22.738(2)$ Å<br>$c = 6.5434(9)$ Å | $a = 22.7012(19)$ Å<br>$c = 6.5603(9)$ Å |
| Volume                                       | 3383.0(8) Å <sup>3</sup>               | 3380.8(7) Å <sup>3</sup>                 |
| Z                                            | 8                                      | 8                                        |
| Density (calculated)                         | 2.091 g cm <sup>-3</sup>               | 2.092 g cm <sup>-3</sup>                 |
| Absorption coefficient $\mu$                 | 7.228 mm <sup>-1</sup>                 | 7.233 mm <sup>-1</sup>                   |
| $F(000)$                                     | 2032                                   | 2032                                     |
| $R(\text{int})$                              | 0.0804                                 | 0.0995                                   |
| Completeness (to $\vartheta = 25.00^\circ$ ) | 0.997                                  | 0.996                                    |
| $R1$ (observed data $I > 2\sigma(I)$ )       | 0.0774                                 | 0.0957                                   |
| $wR2$ (all data)                             | 0.1663                                 | 0.2319                                   |
| Reflections (independent)                    | 5957 (2899)                            | 5229 (2958)                              |
| Flack parameter                              | -0.04(4)                               | -0.048(11)                               |

  

|                                              | PSS 220 K                             | PSS 230K                              |
|----------------------------------------------|---------------------------------------|---------------------------------------|
| Photoconversion                              | 38 %                                  | 26 %                                  |
| Temperature                                  | 220(2) K                              | 230(2) K                              |
| Wavelength                                   | 0.71073 Å                             | 0.71073 Å                             |
| Empirical formula                            | C15 H12 N3 O7 Re1                     | C15 H12 N3 O7 Re1                     |
| Formula Weight                               | 532.48 g mol <sup>-1</sup>            | 532.48 g mol <sup>-1</sup>            |
| Crystal system                               | Tetragonal                            | Tetragonal                            |
| Space group                                  | I-4                                   | I-4                                   |
| Unit cell parameters (constrained)           | $a = 22.543(2)$ Å<br>$c = 6.625(1)$ Å | $a = 22.581(2)$ Å<br>$c = 6.665(1)$ Å |
| Volume                                       | 3366.7(9) Å <sup>3</sup>              | 3398.3(10) Å <sup>3</sup>             |
| Z                                            | 8                                     | 8                                     |
| Density (calculated)                         | 2.101 g cm <sup>-3</sup>              | 2.081 g cm <sup>-3</sup>              |
| Absorption coefficient $\mu$                 | 7.263 mm <sup>-1</sup>                | 7.196 mm <sup>-1</sup>                |
| $F(000)$                                     | 2032                                  | 2032                                  |
| $R(\text{int})$                              | 0.1366                                | 0.1444                                |
| Completeness (to $\vartheta = 23.21^\circ$ ) | 0.998                                 | 0.998                                 |
| $R1$ (observed data $I > 2\sigma(I)$ )       | 0.1062                                | 0.0934                                |
| $wR2$ (all data)                             | 0.2401                                | 0.2233                                |
| Reflections (independent)                    | 6256 (2412)                           | 6266 (2430)                           |
| Flack parameter                              | 0.00(6)                               | -0.04(5)                              |

|                                           | PSS 240 K                         | PSS 250K                          |
|-------------------------------------------|-----------------------------------|-----------------------------------|
| Photoconversion                           | 0 %                               | 0 %                               |
| Temperature                               | 240(2) K                          | 240(2) K                          |
| Wavelength                                | 0.71073 Å                         | 0.71073 Å                         |
| Empirical formula                         | C15 H12 N3 O7 Re1                 | C15 H12 N3 O7 Re1                 |
| Formula Weight                            | 532.48 g mol <sup>-1</sup>        | 532.48 g mol <sup>-1</sup>        |
| Crystal system                            | Tetragonal                        | Tetragonal                        |
| Space group                               | I-4                               | I-4                               |
| Unit cell parameters (constrained)        | a = 22.393(2) Å<br>c = 6.657(1) Å | a = 22.358(2) Å<br>c = 6.674(1) Å |
| Volume                                    | 3338.0(8) Å <sup>3</sup>          | 3336.1(9) Å <sup>3</sup>          |
| Z                                         | 8                                 | 8                                 |
| Density (calculated)                      | 2.119 g cm <sup>-3</sup>          | 2.120 g cm <sup>-3</sup>          |
| Absorption coefficient $\mu$              | 7.326 mm <sup>-1</sup>            | 7.330 mm <sup>-1</sup>            |
| $F(000)$                                  | 2032                              | 2032                              |
| $R(\text{int})$                           | 0.1261                            | 0.1043                            |
| Completeness (to $\theta = 23.21^\circ$ ) | 0.997                             | 0.996                             |
| $R1$ (observed data $I > 2\sigma(I)$ )    | 0.0883                            | 0.0786                            |
| $wR2$ (all data)                          | 0.1896                            | 0.1811                            |
| Reflections (independent)                 | 6200 (2377)                       | 6308 (2386)                       |
| Flack parameter                           | -0.05(4)                          | 0.02(3)                           |

## 7. References

1. M. P. Fuller and P. R. Griffiths, *Analytical Chemistry*, 1978, **50**, 1906-1910.
2. C. F. Macrae, I. J. Bruno, J. A. Chisholm, P. R. Edgington, P. McCabe, E. Pidcock, L. Rodriguez-Monge, R. Taylor, J. v. d. Streek and P. A. Wood, *Journal of Applied Crystallography*, 2008, **41**, 466-470.
